# Supplementary material
Source: Springer Nature journal article supplement (https://www.springermedizin.de/resource/supplementary/12883_2010_400_MOESM1_ESM.pdf/9455064)

**SNP**  
( $\mu\text{g}\cdot\text{min}^{-1}\cdot\text{dL}^{-1}$ )

**Substance P**  
( $\text{pmol}\cdot\text{min}^{-1}\cdot\text{dL}^{-1}$ )

**L-NMMA**  
( $\mu\text{mol}\cdot\text{min}^{-1}\cdot\text{dL}^{-1}$ )

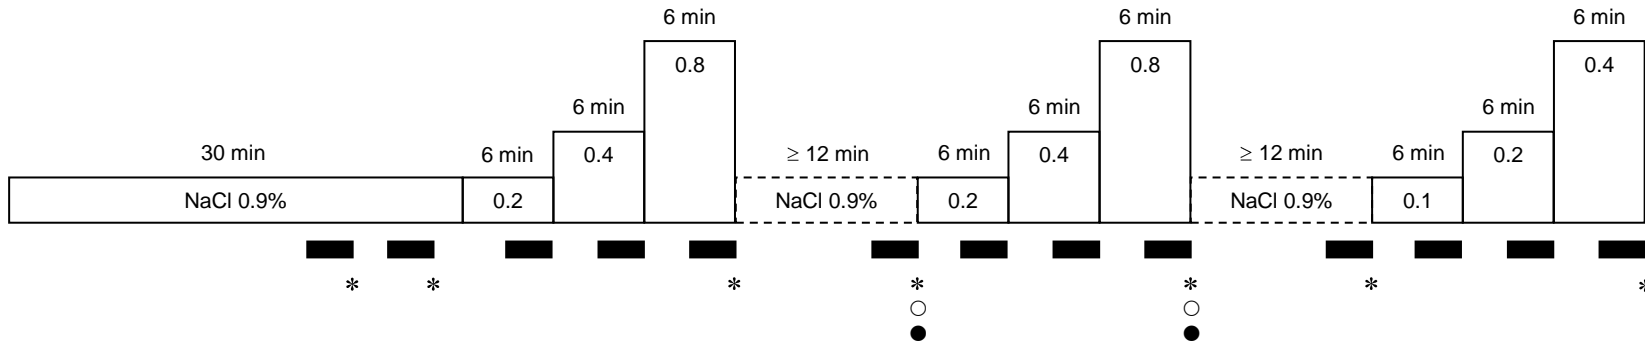

Supplement: MOESM1 [file 9455064]
